# Supplementary material
Source: PubMed Central journal article supplement (PMC9008562)
Supplement: jamadermatol-e220354-s001.pdf [file jamadermatol-e220354-s001.pdf]

## Supplementary Online Content

Said JT, Liu M, Talia J, et al. Risk factors for the development of bullous pemphigoid in US patients receiving immune checkpoint inhibitors. *JAMA Dermatol*. Published online April 13, 2022. doi:10.1001/jamadermatol.2022.0354

**eTable.** Best Overall Responses to Immune Checkpoint Inhibitor Therapy Across ICI-BP Cases and Controls

This supplementary material has been provided by the authors to give readers additional information about their work.

**eTable.** Best Overall Responses to Immune Checkpoint Inhibitor Therapy Across ICI-BP Cases and Controls

| Characteristics               | All (N=105) | BP (N=35) | Non-BP dAE (N=33) | No dAE (N=37) | BP vs All Controls | BP vs Non-BP dAE | BP vs No dAE |
|-------------------------------|-------------|-----------|-------------------|---------------|--------------------|------------------|--------------|
| <b><u>BOR</u></b>             |             |           |                   |               | 0.16               | 0.75             | <b>0.01</b>  |
| CR                            | 37 (35.2)   | 15 (42.9) | 16 (48.5)         | 6 (16.2)      |                    |                  |              |
| PR                            | 35 (33.3)   | 14 (40.0) | 9 (27.3)          | 12 (32.4)     |                    |                  |              |
| SD                            | 15 (14.3)   | 2 (5.7)   | 3 (9.1)           | 10 (27.0)     |                    |                  |              |
| PD                            | 18 (17.1)   | 4 (11.4)  | 5 (15.2)          | 9 (24.3)      |                    |                  |              |
| <b><u>BOR, simplified</u></b> |             |           |                   |               | <b>0.03</b>        | 0.55             | <b>0.003</b> |
| Response                      | 72 (68.6)   | 29 (82.9) | 25 (75.8)         | 18 (48.6)     |                    |                  |              |
| No response                   | 33 (31.4)   | 6 (17.1)  | 8 (24.2)          | 19 (51.4)     |                    |                  |              |

ICI-BP patients, in terms of BOR, had similar distributions of ICI response outcomes as patients with non-BP dAEs. When controls were not adjusted for non-BP dAEs, ICI-BP patients were more likely to have a response (CR or PR) than patients who did not have ICI-BP, regardless of other dAEs (p=0.03).

Compared to patients with no dAEs (BP or otherwise), patients with ICI-BP were very significantly more likely to have a response (CR or PR) (p=0.003). All p-values were calculated from four-by-two (BOR) or two-by-two (BOR, simplified) Fisher's exact tests, between the BP cases and indicated comparator group.

*Abbreviations: BOR = best overall response. BP = bullous pemphigoid. CR = complete response. dAE = dermatologic immune-related adverse event. ICI = immune checkpoint inhibitor. ICI-BP = immune checkpoint inhibitor-induced bullous pemphigoid. PD = progression of disease. PR = partial response. SD = stable disease.*
